# Supplementary material for: An Enzyme-Linked Immunosorbent Assay for the Detection of Mitochondrial DNA–Protein Cross-Links from Mammalian Cells
Source: MDPI journal article supplement (doi:10.3390/dna2040019), 2022-11-11
Supplement: s1 [file s1]

Archive with 1 entries (1 files):
- dna-1967077-supplementary.pdf
