# Supplementary material for: An Enzyme-Linked Immunosorbent Assay for the Detection of Mitochondrial DNA–Protein Cross-Links from Mammalian Cells
Source: MDPI journal article supplement (doi:10.3390/dna2040019), 2022-11-11
Supplement: s1 [file s1 › dna-1967077-supplementary.pdf]

Article

# An Enzyme-Linked Immunosorbent Assay for the Detection of Mitochondrial DNA–Protein Cross-Links from Mammalian Cells

Wenyan Xu<sup>1</sup> and Linlin Zhao<sup>1,2,\*</sup>

<sup>1</sup> Department of Chemistry, University of California Riverside, Riverside, CA 92521, USA

<sup>2</sup> Environmental Toxicology Graduate Program, University of California Riverside, Riverside, CA 92521, USA

\* Correspondence: Tel: +1-951-827-9081; linlin.zhao@ucr.edu

## Supplementary Materials

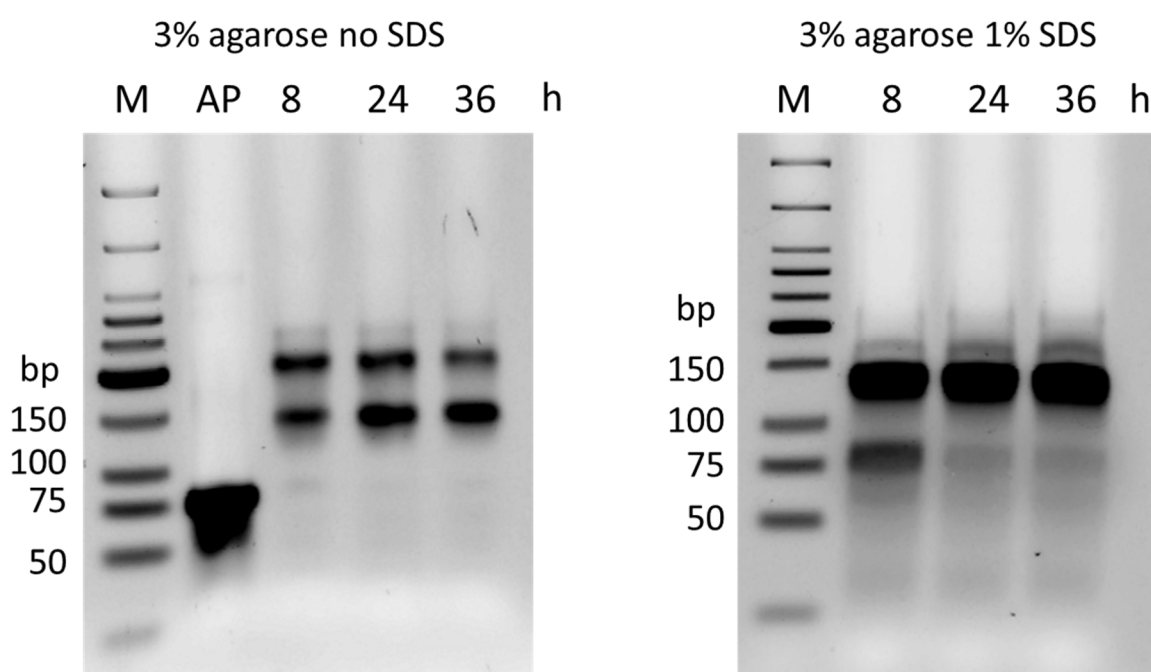

**Figure S1.** Cross-linking reactions between TFAM and 80bp AP-DNA monitored by agarose gel. Left panel is an agarose gel electrophoresis performed without SDS. The right panel is an agarose gel electrophoresis performed in the presence of 1% SDS. M, DNA molecular weight ladder (New England Biolabs, cat No. B7025); AP, 80bp AP-DNA substrate; reaction times, 8, 24, 36 hours.

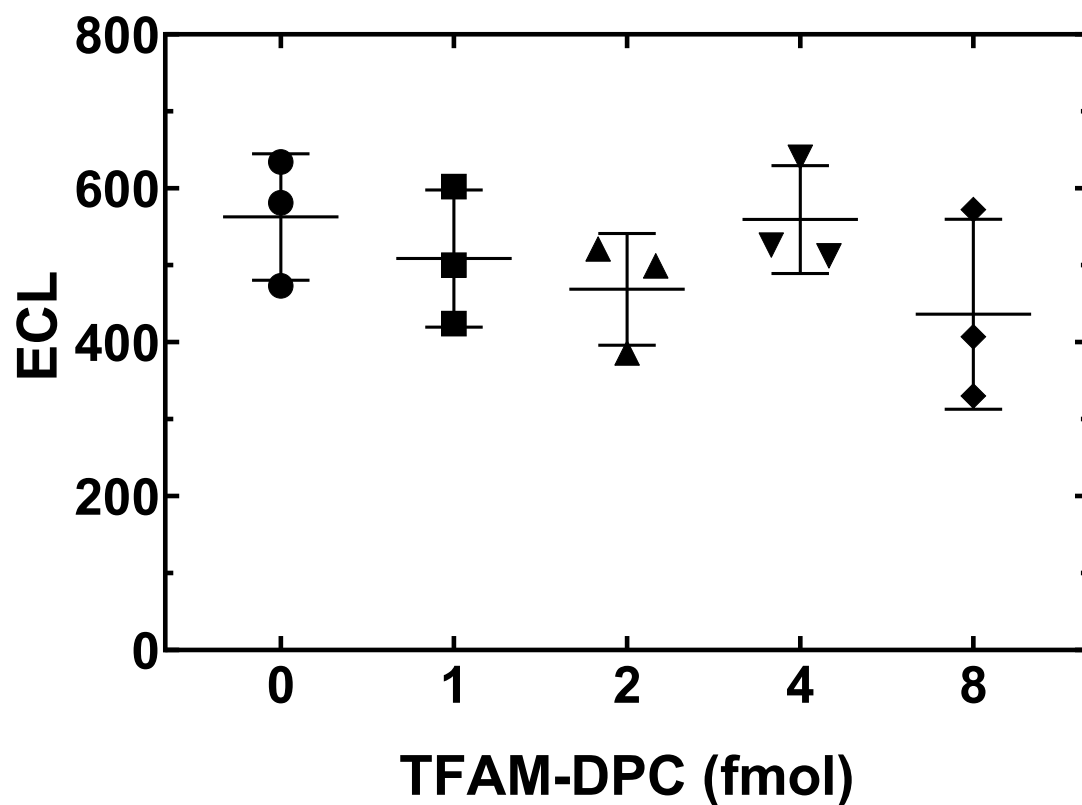

**Figure S2.** The enhanced chemiluminescent signals obtained from a microplate with an untreated polystyrene surface when different amount of TFAM-DPCs were coated onto the plate. .

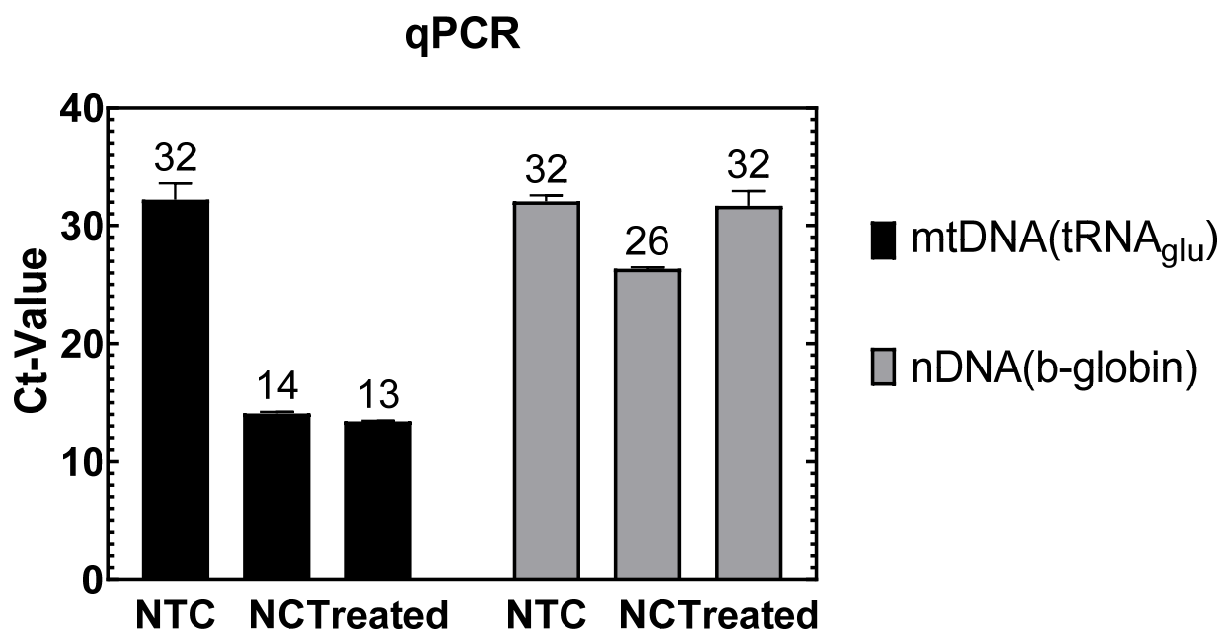

**Figure S3.** Ct-values from turbonuclease treated mitochondria (Treated) or untreated mitochondria (NC) indicating the removal of nuclear DNA while mitochondrial DNA remained intact. NTC, non-template control.

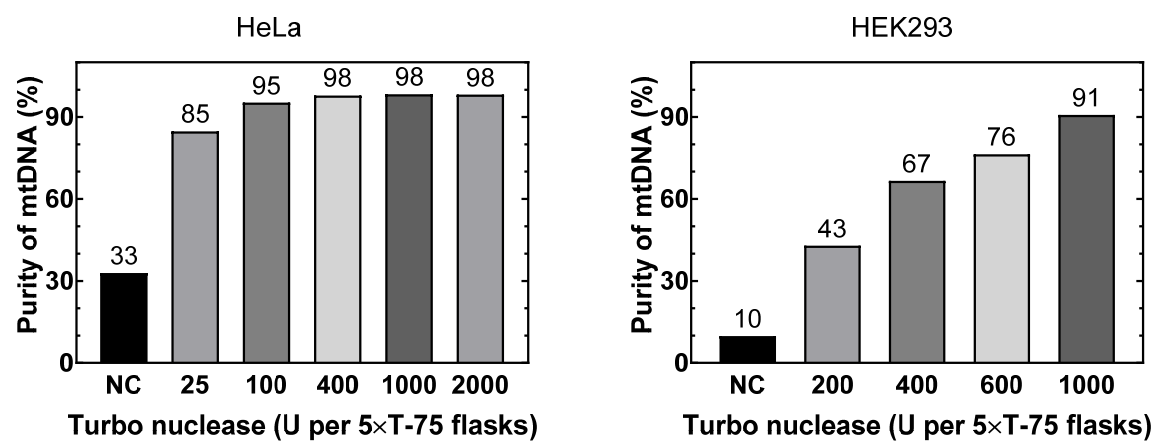

**Figure S4.** Evaluation of mtDNA purity (based on qPCR data) under different amounts of turbonuclease with mitochondria from HeLa cells and HEK293 cells.
